# Supplementary material
Source: PubMed Central journal article supplement (PMC9015374)
Supplement: CPHC-23-e202100704-s001.pdf [file CPHC-23-e202100704-s001.pdf]

# ChemPhysChem

Supporting Information

## **The Extended Hadamard Transform: Sensitivity-Enhanced NMR Experiments Among Labile and Non-Labile $^1\text{H}$ s of SARS-CoV-2-derived RNAs**

Jihyun Kim, Mihajlo Novakovic, Sundaresan Jayanthi, Adonis Lupulescu, Ēriks Kupče, J. Tassilo Grün, Klara Mertinkus, Andreas Oxenfarth, Harald Schwalbe, and Lucio Frydman\*

## Supplementary Information

---

**Table S1.** Parameters used for conventional, SMT, HMT, HETMAT and Hadamard HETMAT NOESY experiments on the RNA fragments presented in the main text.

| RNA                                           | 5 SL5b+c   |            |              |             |                       |                 |            | 5 SL8                 |                |            |
|-----------------------------------------------|------------|------------|--------------|-------------|-----------------------|-----------------|------------|-----------------------|----------------|------------|
| Parameters                                    | HMT NOESY  | SMT NOESY  | Sofast NOESY | Conv. NOESY | Hadamard HETMAT NOESY | HETMAT NOESY    | HMQC NOESY | Hadamard HETMAT NOESY | HETMAT NOESY   | HMQC NOESY |
| Temperature (K)                               | 283        | 283        | 283          | 283         | 283                   | 283             | 283        | 283                   | 283            | 283        |
| SW (ppm)                                      | 23.8       | 23.8       | 23.8         | 23.8        | 23.8                  | 23.8            | 23.8       | 23.8                  | 23.8           | 23.8       |
| TD                                            | 3072       | 3072       | 3072         | 3072        | 3072                  | 3072            | 3072       | 3072                  | 3072           | 3072       |
| SW <sub>1</sub> (ppm)                         | /          | /          | 5            | 11.5        | /                     | /               | 24         | /                     | /              | 24         |
| TD <sub>1</sub>                               | 8 or 16    | 12         | 256          | 768         | 8 or 16               | 13              | 384        | 8 or 32               | 21             | 384        |
| NS                                            | 128        | 512        | 128          | 32          | 128 or 64             | 512             | 28         | 128                   | 512            | 24         |
| DS                                            | 32         | 32         | 32           | 32          | 32                    | 32              | 32         | 32                    | 32             | 32         |
| d <sub>1</sub> (s) <sup>*</sup>               | 0.3 or 1.5 | 0.3 or 1.5 | 0.3          | 1.0         | 1.5                   | 1.5             | 1.5        | 1.5                   | 1.5            | 1.5        |
| RG                                            | 101        | 101        | 101          | 101         | 101                   | 101             | 101        | 101                   | 101            | 101        |
| O <sub>1</sub> (F <sub>2</sub> , ppm)         | 4.697      | 4.693      | 4.693        | 4.693       | 4.693                 | 4.693           | 4.693      | 4.693                 | 4.693          | 4.693      |
| O <sub>1</sub> (F <sub>1</sub> , ppm)         | /          | /          | 153          | 153         | 116                   | 116             | 116        | 116                   | 116            | 116        |
| d <sub>8</sub> (NOE, ms)                      | 800        | 800        | 175          | 175         | 125                   | a: 125<br>b: 30 | 175        | 80                    | a: 80<br>b: 50 | 150        |
| $\gamma B_1/2\pi$ saturation                  | 8          | 8 - 30     | /            | /           | /                     | /               | /          | /                     | /              | /          |
| n <sup>**</sup> (number of loops)             | /          | /          | /            | /           | 7                     | a: 7<br>b: 20   | /          | 10                    | a: 10<br>b: 17 | /          |
| RF CP field <sup>*</sup> $\omega_1/2\pi$ (Hz) | /          | /          | /            | /           | 20                    | a: 50<br>b: 75  | /          | 20                    | a: 50<br>b: 75 | /          |

<sup>\*</sup> d<sub>1</sub> = 0.3 and 1.5 sec were used for the selective SE and WG-based HMT/SMT, respectively.

<sup>\*\*</sup> a and b indicate the different parameters applied for narrow and broad peaks, respectively.

Selective SE-based Extended HMT (62 min)  
WG-based Extended HMT (124 min)

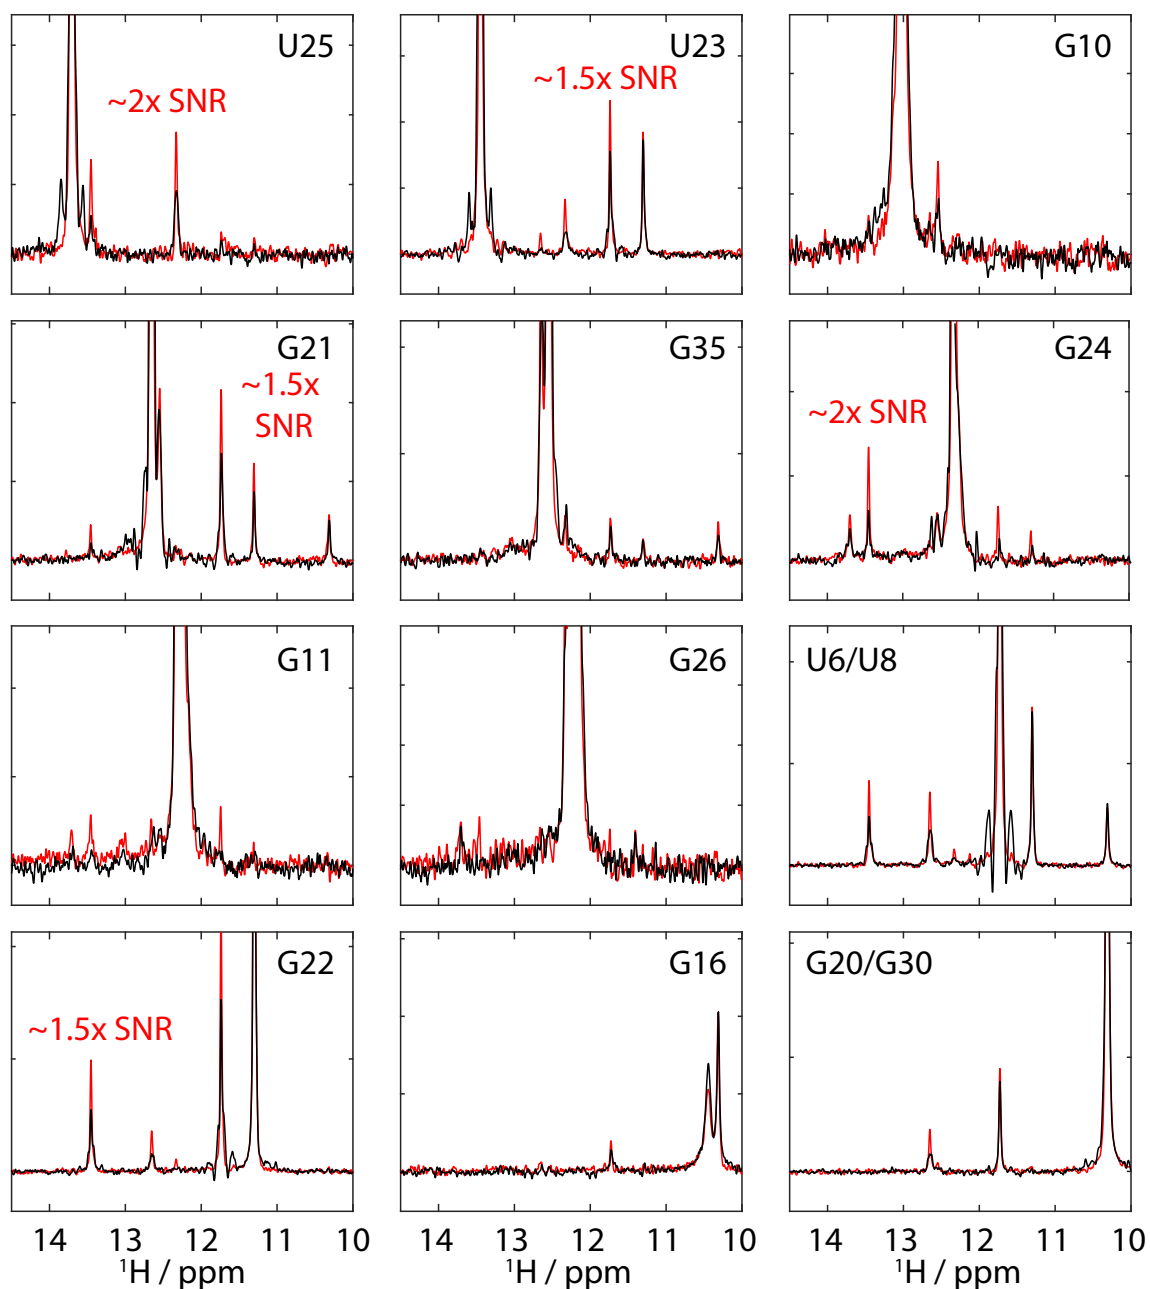

**Figure S1.** Comparison between selective spin-echo (SE) based- and WATERGATE (WG) based extended HMT NOESY for the 5\_SL5b+c fragment. Note that ~2 times SNR enhancements and ~3 times SNRT enhancements are observed in selective SE-based compared to WG-based experiments.

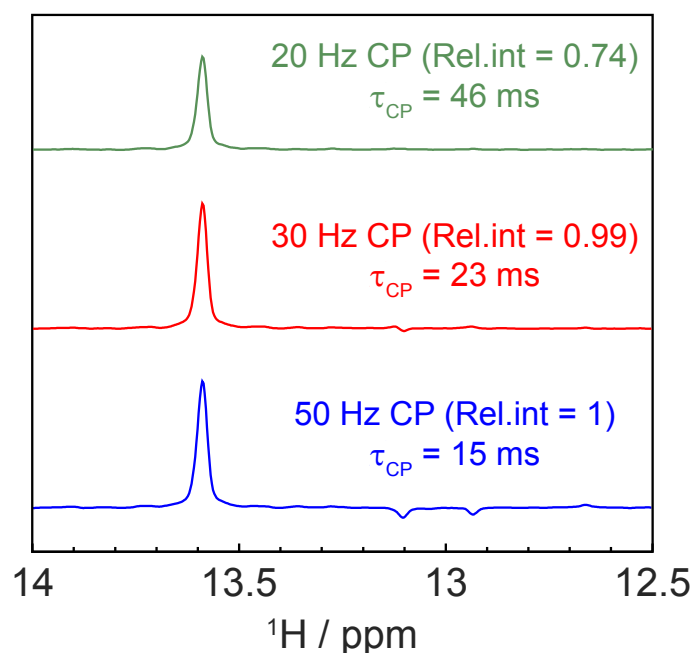

**Figure S2.** Assessing the performance of selective CP in Hadamard HETMAT experiments, by comparing 1D spectra measured with 1 loop and  $\tau_{NOE} = 0$  ms but with different RF CP fields  $\omega_1/2\pi$ . Unlike the regular HETMAT experiment, where 50 Hz fields show sufficient selectivity at 1 GHz  $^1\text{H}$  frequencies, 1D slices measured with 50 Hz and 30 Hz CP contain artifacts arising from the absence of a reference scan subtraction (see main text).

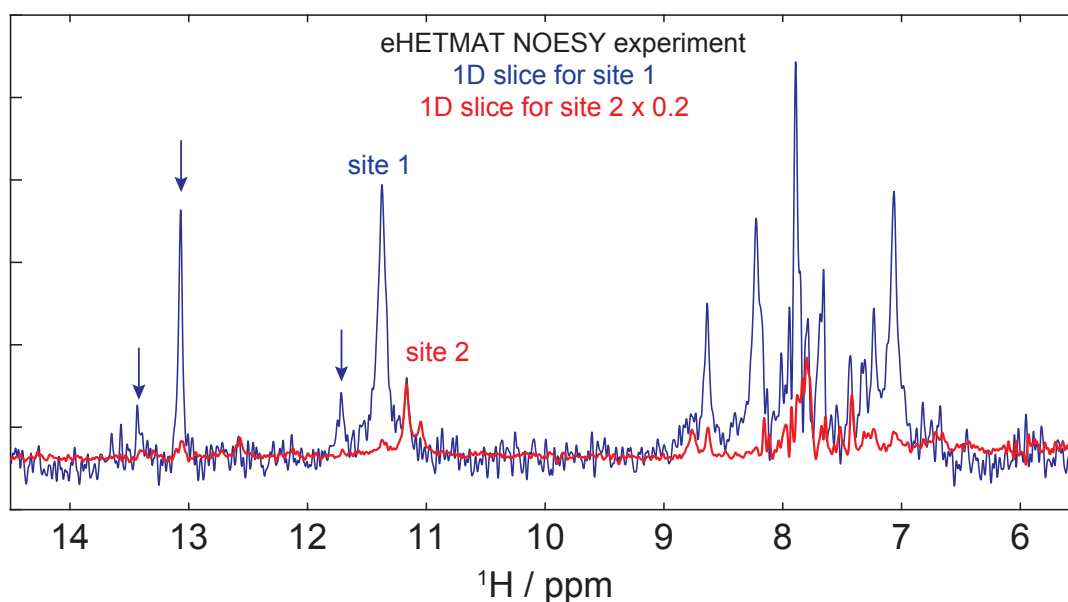

**Figure S3.** Illustrating the discrimination between genuine cross-peaks arising from site 1 and cross-talk-derived peaks arising from site 2. Arrows indicate the genuine imino-imino cross-peaks for site 1. For the amino region, multiple –but not all– peaks are genuine site 1 cross-peaks (not labeled with arrows).

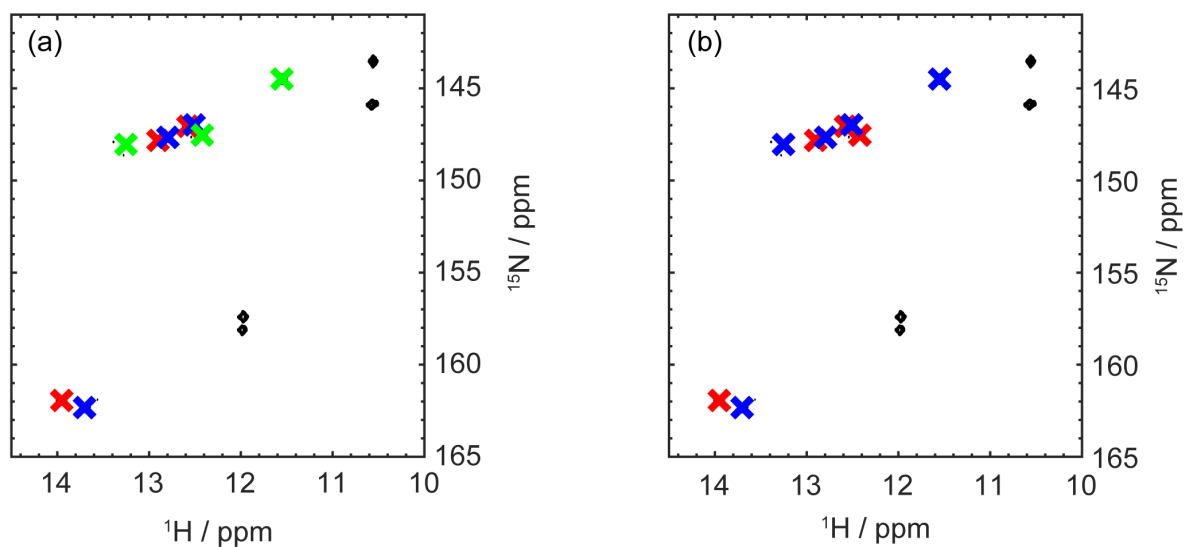

**Figure S4.** [ $^{15}\text{N}$ , $^1\text{H}$ ]-HSQC spectra of the 5\_SL5 fragment with peaks marked as selected for the extended HETMAT NOESY implementations with Hadamard matrices of dimension: (a) 8x8 ( $E_4$ ); (b) 16x16 ( $E_8$ ). Peaks encoded and decoded in the same set of experiments are marked with the same color.

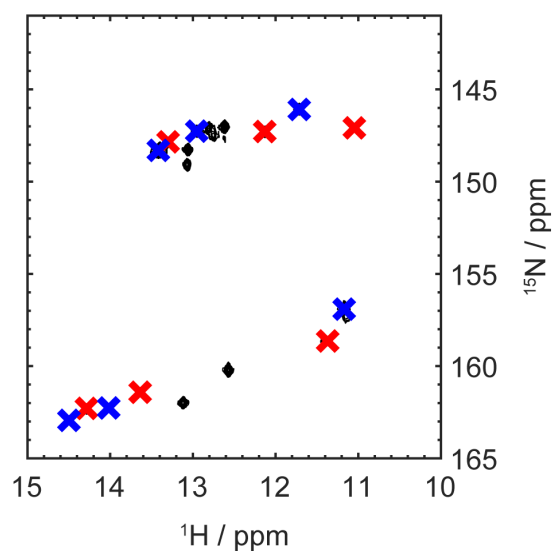

**Figure S5.** Idem as Figure S4, but for 5\_SL8. An extended Hadamard matrix of dimension 16x16 ( $E_8$ ) was used in these cases.

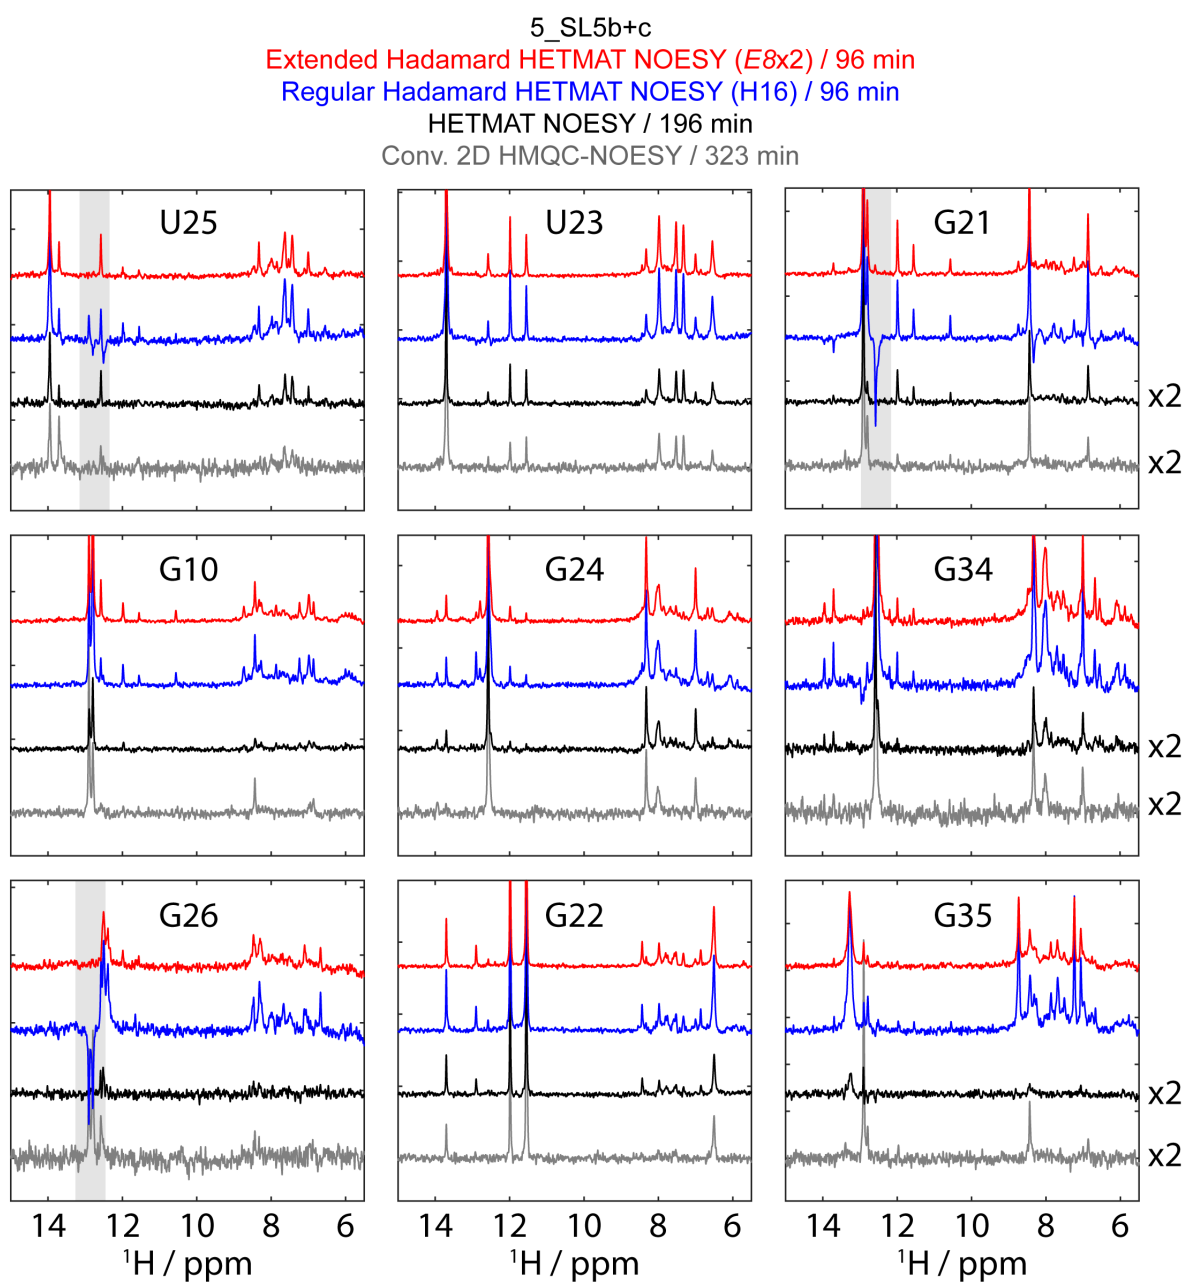

**Figure S6.** Comparison between conventional 2D HMQC NOESY (gray), HETMAT (black), regular Hadamard HETMAT (blue), and extended Hadamard HETMAT NOESY spectra acquired on 5\_SL5b+c RNA fragment. Conditions are as shown in Figure 5 of the main text, but now all cross sections are displayed in the panels.

5\_SL8  
Extended Hadamard HETMAT NOESY (E8x2) / 96 min  
Regular Hadamard HETMAT NOESY (H16) / 95 min  
HETMAT NOESY / 262 min  
Conv. 2D HMQC-NOESY / 277 min

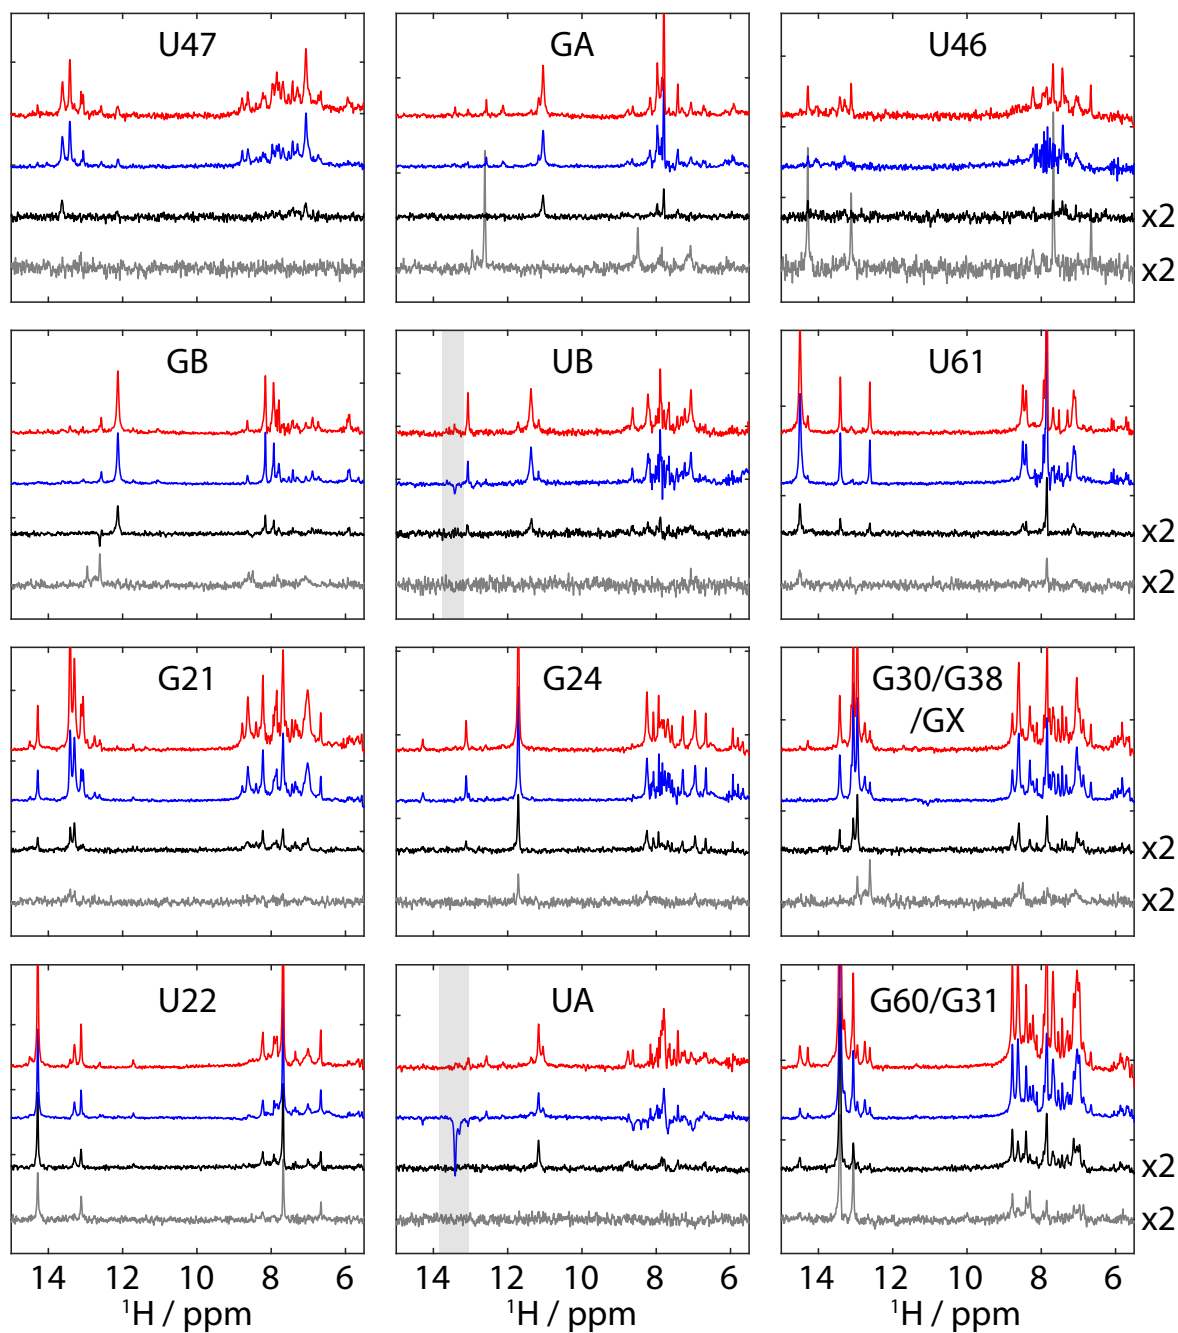

**Figure S7.** Idem as Figure S5, but for the 5\_SL8 RNA fragment. Acquisition parameters for these data are as detailed in Figure 6 of the main text.



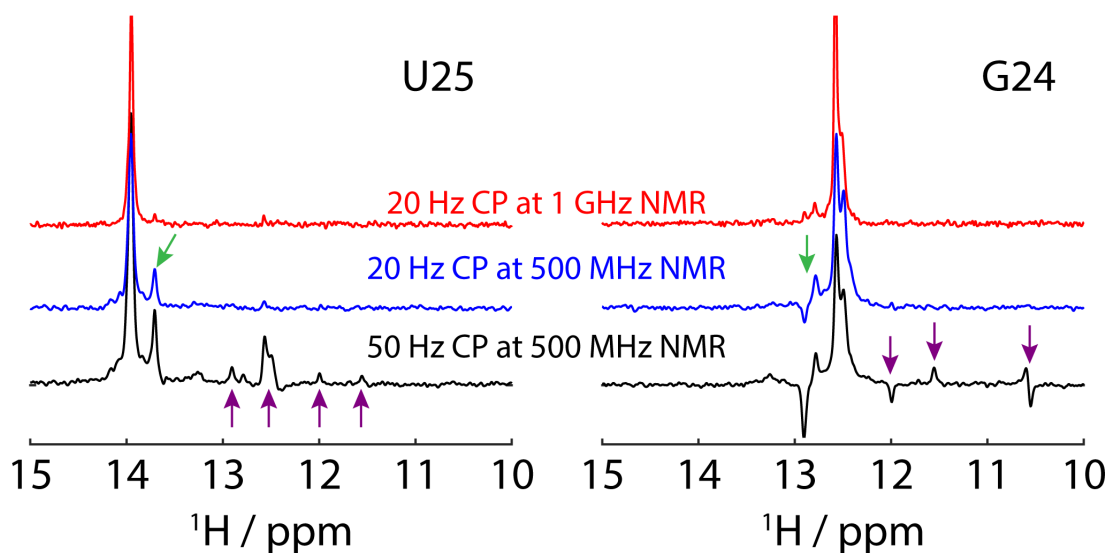

**Figure S8.** Assessing the selectivity of CP in Hadamard HETMAT experiments performed at 1 GHz (red) and at 500 MHz (blue and black)  $^1\text{H}$  NMR frequencies on the indicated 5SL5b+c residues. Spectra were measured as described for Figure S4. Note that artifacts (purple arrows) arising due to the overlapping RF fields clearly visible in the black spectra. These cross-talk artifacts disappear when CP is done at 20 Hz matching fields, but other artifacts are still observed in the 500 MHz data (green arrow). These cross-talks disappear as sites are further separated at 1 GHz, but at 500 MHz they can lead to fake positive/negative cross-peak patterns after the Hadamard processing.
